# Supplementary material
Source: PubMed Central journal article supplement (PMC2797757)
Supplement: NIHMS163005-supplement-supp_data.pdf [file NIHMS163005-supplement-supp_data.pdf]

**New Arylthioindoles and Related Bioisosteres at the Sulfur Bridging Group. 4. Synthesis, Tubulin Polymerization, Cell Growth Inhibition, and Molecular Modeling Studies**

Giuseppe La Regina, Taradas Sarkar, Ruoli Bai, Michael C. Edler, Roberto Saletti, Antonio Coluccia, Francesco Piscitelli, Lara Minelli, Valerio Gatti, Carmela Mazzoccoli, Vanessa Palermo, Cristina Mazzoni, Claudio Falcone, Anna Ivana Scovassi, Vincenzo Giansanti, Pietro Campiglia, Amalia Porta, Bruno Maresca, Ernest Hamel, Andrea Brancale, Ettore Novellino, and Romano Silvestri

**TOC graphics**

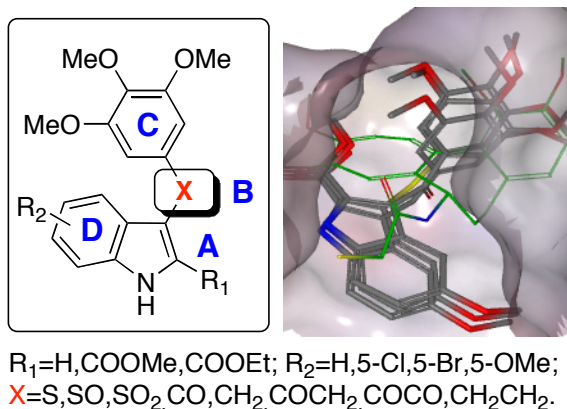

**Contents**

- **Figure 1S.** Effects of compounds **24**, **27-29**, **36**, **39** and **41** on murine macrophage J744.1 cell morphology.
- **Table 1S.** Elemental analyses of new derivatives **7**, **8**, **10**, **11**, **13**, **14**, **16**, **17**, **19-23**, **25-32**, **35**, **37-41**, and **43-56**.

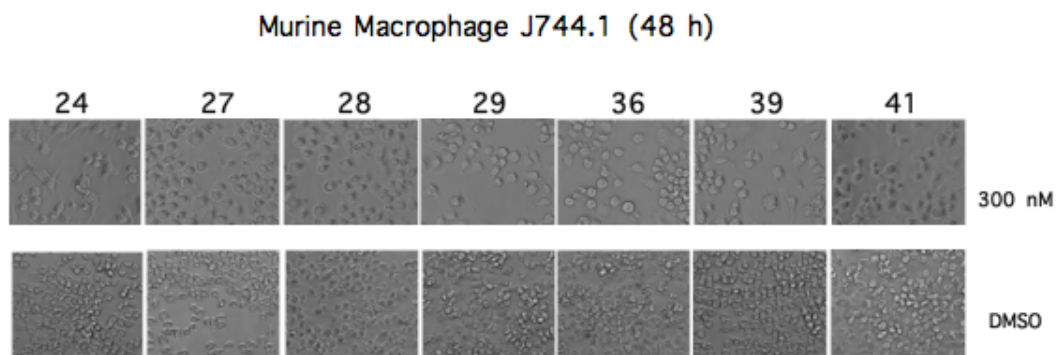

**Figure 1S.** Effects of compounds **24**, **27-29**, **36**, **39** and **41** on murine macrophage J744.1 cell morphology, as visualized by time-lapse microscopy (magnification 20 ×)

**Table 1S.** Elemental Analyses of New Derivatives **7, 8, 10, 11, 13, 14, 16, 17, 19-23, 25-32, 35, 37-41, and 43-56.**

| Compd     | Calcd                                          | Found                                          |
|-----------|------------------------------------------------|------------------------------------------------|
| <b>7</b>  | C, 65.02; H, 5.19; N, 3.79.                    | C, 65.01; H, 5.18; N, 3.79.                    |
| <b>8</b>  | C, 67.58; H, 5.95; N, 3.94.                    | C, 67.57; H, 5.95; N, 3.92.                    |
| <b>10</b> | C, 65.77; H, 5.52; N, 3.65.                    | C, 65.77; H, 5.53; N, 3.64.                    |
| <b>11</b> | C, 68.23; H, 6.28; N, 3.79.                    | C, 68.22; H, 6.25; N, 3.79.                    |
| <b>13</b> | C, 65.29; H, 4.67; Cl, 10.13; N, 4.06.         | C, 65.30; H, 4.67; Cl, 10.14; N, 4.05.         |
| <b>14</b> | C, 65.24; H, 5.48; Cl, 10.56; N, 4.23.         | C, 65.24; H, 5.49; Cl, 10.58; N, 4.21.         |
| <b>16</b> | C, 59.54; H, 4.50; Cl, 8.67; N, 3.47.          | C, 59.53; H, 4.51; Cl, 8.66; N, 3.47.          |
| <b>17</b> | C, 61.68; H, 5.18; Cl, 8.99; N, 3.60.          | C, 61.69; H, 5.17; Cl, 8.98; N, 3.60.          |
| <b>19</b> | C, 60.42; H, 4.83; Cl, 8.38; N, 3.36.          | C, 60.44; H, 4.83; Cl, 8.37; N, 3.35.          |
| <b>20</b> | C, 62.51; H, 5.50; Cl, 8.67; N, 3.47.          | C, 62.51; H, 5.51; Cl, 8.66; N, 3.46.          |
| <b>21</b> | C, 61.24; H, 5.14; Cl, 8.11; N, 3.25.          | C, 61.25; H, 5.13; Cl, 8.11; N, 3.26.          |
| <b>22</b> | C, 59.31; H, 4.53; Cl, 7.86; N, 3.15.          | C, 59.31; H, 4.54; Cl, 7.85; N, 3.14.          |
| <b>23</b> | C, 62.29; H, 5.80; Cl, 8.38; N, 3.36.          | C, 62.30; H, 5.81; Cl, 8.38; N, 3.36.          |
| <b>25</b> | C, 55.52; H, 4.14; Br, 20.28; N, 3.59.         | C, 55.51; H, 4.13; Br, 20.28; N, 3.59.         |
| <b>26</b> | C, 57.59; H, 4.84; Br, 21.04; N, 3.73.         | C, 57.60; H, 4.85; Br, 21.04; N, 3.73.         |
| <b>27</b> | C, 50.55; H, 4.02; Br, 17.50; N, 3.10.         | C, 50.54; H, 4.01; Br, 17.50; N, 3.11.         |
| <b>28</b> | C, 53.69; H, 4.06; Br, 17.65; N, 3.13.         | C, 53.69; H, 4.07; Br, 17.64; N, 3.14.         |
| <b>29</b> | C, 55.42; H, 4.65; Br, 18.22; N, 3.23.         | C, 55.43; H, 4.64; Br, 18.22; N, 3.22.         |
| <b>30</b> | C, 51.61; H, 4.33; Br, 16.97; N, 3.01; S, 6.87 | C, 51.61; H, 4.32; Br, 16.97; N, 3.00; S, 6.87 |
| <b>31</b> | C, 54.66; H, 4.37; Br, 17.12; N, 3.04.         | C, 54.65; H, 4.36; Br, 17.12; N, 3.04.         |
| <b>32</b> | C, 54.42; H, 7.79; Br, 17.04; N, 3.02.         | C, 54.43; H, 7.79; Br, 17.05; N, 3.02.         |
| <b>35</b> | C, 69.69; H, 6.47; N, 4.28.                    | C, 69.69; H, 6.48; N, 4.29.                    |
| <b>37</b> | C, 57.26; H, 5.05; N, 3.34; S, 7.63.           | C, 57.27; H, 5.06; N, 3.34; S, 7.63.           |
| <b>38</b> | C, 55.15; H, 4.86; N, 3.22; S, 7.35.           | C, 55.14; H, 4.85; N, 3.22; S, 7.35.           |
| <b>39</b> | C, 63.14; H, 5.30; N, 3.51.                    | C, 63.13; H, 5.31; N, 3.51.                    |
| <b>40</b> | C, 62.82; H, 5.78; N, 3.49.                    | C, 62.83; H, 5.79; N, 3.49.                    |
| <b>41</b> | C, 65.43; H, 6.01; N, 3.63.                    | C, 65.44; H, 6.02; N, 3.63.                    |
| <b>43</b> | C, 63.90; H, 5.61; N, 3.39.                    | C, 63.91; H, 5.62; N, 3.40.                    |
| <b>44</b> | C, 63.59; H, 6.07; N, 3.37.                    | C, 63.60; H, 6.06; N, 3.38.                    |
| <b>45</b> | C, 66.14; H, 6.31; N, 3.51.                    | C, 66.13; H, 6.32; N, 3.50.                    |
| <b>46</b> | C, 63.94; H, 6.63; N, 4.39.                    | C, 63.92; H, 6.61; N, 4.39.                    |
| <b>47</b> | C, 65.69; H, 7.25; N, 4.03.                    | C, 65.69; H, 7.24; N, 4.03.                    |
| <b>48</b> | C, 66.46; H, 7.53; N, 3.88.                    | C, 66.46; H, 7.53; N, 3.87.                    |
| <b>49</b> | C, 67.84; H, 8.02; N, 3.60.                    | C, 67.83; H, 8.01; N, 3.60.                    |
| <b>50</b> | C, 59.99; H, 6.29; N, 8.74.                    | C, 60.00; H, 6.30; N, 8.74.                    |
| <b>51</b> | C, 61.25; H, 5.75; N, 4.20.                    | C, 61.24; H, 5.74; N, 4.20.                    |
| <b>52</b> | C, 57.48; H, 5.43; N, 8.38.                    | C, 57.49; H, 5.42; N, 8.38.                    |
| <b>53</b> | C, 57.48; H, 5.43; N, 8.38.                    | C, 57.49; H, 5.44; N, 8.38.                    |
| <b>54</b> | C, 61.85; H, 5.88; N, 4.81.                    | C, 61.84; H, 5.86; N, 4.81.                    |
| <b>55</b> | C, 62.69; H, 7.41; N, 3.32.                    | C, 62.70; H, 7.42; N, 3.32.                    |
| <b>56</b> | C, 51.15; H, 5.21; Cl, 10.78; N, 8.52.         | C, 51.16; H, 5.22; Cl, 10.78; N, 8.53.         |
